# Supplementary material for: Clinical and biochemical indexes from 2019-nCoV infected patients linked to viral loads and lung injury
Source: Springer Nature journal article supplement (doi:10.1007/s11427-020-1643-8), 2020-02-09

Table S1. The Ct values of different sample types from the same case determined by qRT-PCR

| Case No. | Sample collection date (d.a.o) | Ct Values |      |
|----------|--------------------------------|-----------|------|
|          |                                | Swab      | BALF |
| 1        | 9                              | U         | 26.3 |
| 2        | 8                              | 33.5      | 19.2 |
| 3        | 11                             | U         | 26.5 |
| 4        | 12                             | U         | 27.2 |
| 8        | 10                             | 32.5      | U    |

U: Undetected

d.a.o: Days after illness onset

BALF: Bronchoalveolar Lavage Fluid

Figure S1

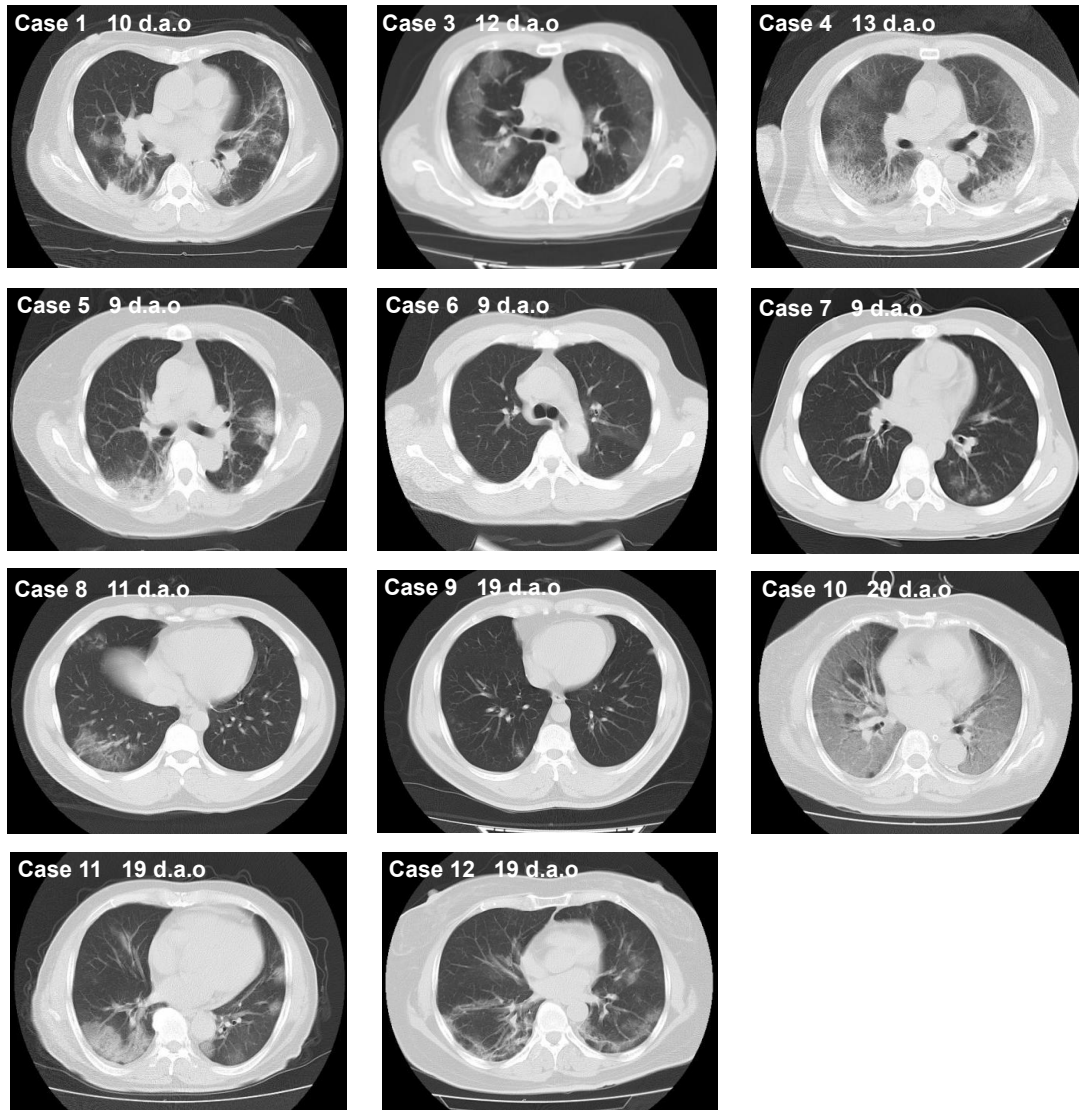

Figure S2

A

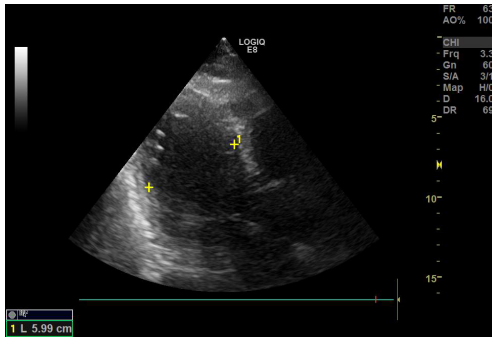

B

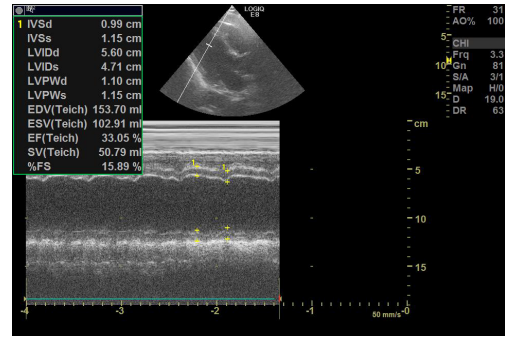

C

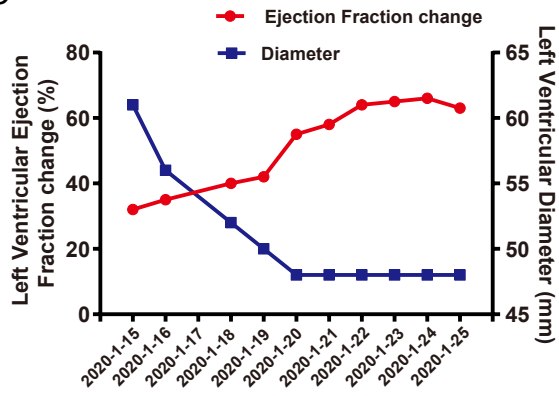

Figure S3

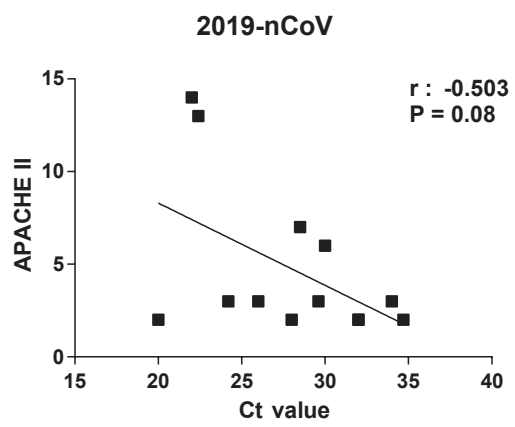

Supplement: 11427_2020_1643_MOESM1_ESM.pdf [file 11427_2020_1643_MOESM1_ESM.pdf]
